# Supplementary material for: Characterization of the Microenvironment in Positive and Negative Sentinel Lymph Nodes from Melanoma Patients
Source: PubMed Central journal article supplement (PMC4517810; doi:10.1371/journal.pone.0133363), 2015-07-28
Supplement: pone.0133363.s002.pdf [file pone.0133363.s002.pdf]

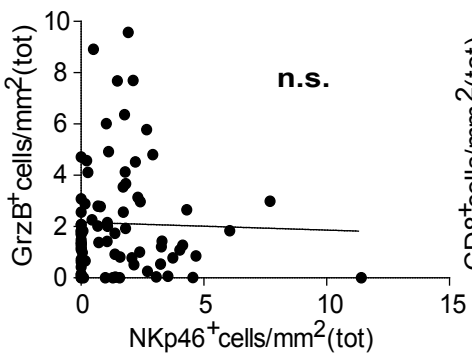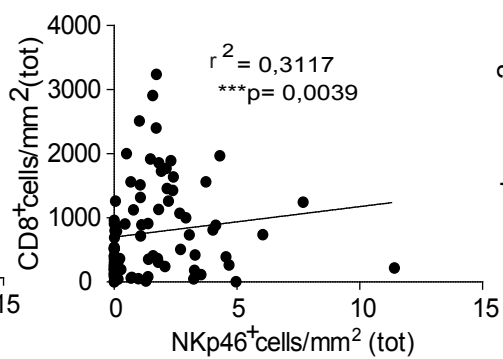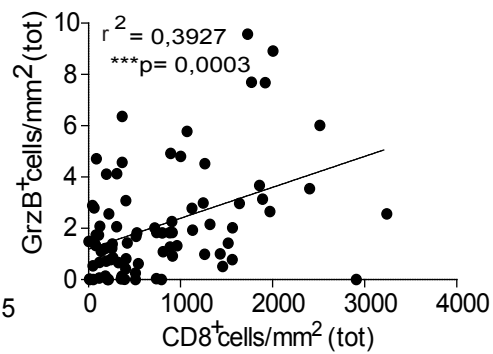

Figure S2
